# Supplementary material
Source: HighWire-hosted journal article supplement (https://bmjopen.bmj.com/content/7/12/e018342)
Supplement: inline-supplementary-material-1 [file inline-supplementary-material-1.pdf]

## Appendix

### Appendix 1. The search string

(vibration OR vibrations OR vibratory) AND (Fractures OR fracture OR DXA OR Dual-energy X-ray absorptiometry OR dual energy x-ray absorptiometry OR dual energy x ray absorptiometry OR dual-energy X ray absorptiometry OR BMD OR bone mineral density OR bone density OR bone mass OR bone quality OR bone qualities OR bone formation OR bone turnover OR accidental fall OR accidental falls OR falls OR fall OR falling OR bone biomarker OR bone biomarkers OR CTX OR P1NP OR carboxy-terminal collagen crosslink OR carboxy terminal crosslink OR amino-terminal propeptide of type I collagen OR amino terminal propeptide of type I collagen OR Calcaneal quantitative ultrasound OR QUS OR Bone Biopsy OR bone biopsies OR HRQCT OR High resolution peripheral quantitative computed tomography OR HRpQCT OR High resolution quantitative computed tomography)
